# Supplementary material for: Knowledge about hereditary nonpolyposis colorectal cancer; mutation carriers and physicians at equal levels
Source: BMC Med Genet. 2009 Mar 26;10:30. doi: 10.1186/1471-2350-10-30 (PMC2671498; doi:10.1186/1471-2350-10-30)
Supplement: Additional file 1 — Table. Questionnaire statements and number (%) of correct answers. [file 1471-2350-10-30-S1.xls]

## Sheet: Blad1
Statements	Mutation carriers	Physicians	p-value*
1. CRC affects 5% of all individuals in Sweden (true)	52 (78%)	74 (73%)	0.46
2. Individuals carrying a MMR mutation will definitely develop cancer (false)	47 (70%)	75 (74%)	0.56
3. Individuals not carrying a HNPCC mutation will never develop CRC (false)	66 (99%)	100 (98%)	0.82
4. Females with HNPCC suffer an increased risk of endometrial cancer (true)	53 (79%)	79 (77%)	0.80
5. Females with HNPCC suffer an increased risk of ovarian cancer (true)	42 (63%)	62 (61%)	0.80
6. Colonoscopy is only useful in people with bowel symptoms (false)	46 (69%)	93 (91%)	<0.001
7. Individuals that carry HNPCC mutations need regular colonoscopies (true)	64 (96%)	102 (100%)	0.03
8. Individuals with HNPCC will pass the mutated gene on to 25% (1 in 4) of their children (false)	35 (52%)	31 (30%)	0.004
9. Tumor tissue can be used in HNPCC diagnosis (true)	47 (70%)	92 (90%)	0.001
10. Blood samples can be used for genetic testing (true)	60 (90%)	92 (90%)	0.89
11. The disease is most often inherited from the male side of the family (false)	50 (75%)	76 (75%)	0.99
*Chi-2 test

## Sheet: Blad2
	Question						Right	Wrong
84	1,2,3	General population and HNPCC associated cancer risk					208		252
84	4.5	Additional cancer risks associated with MMR mutations					118		168
84	6.7	Colorectal cancer surveillance					161		168
84	8.11	The risk of passing on HNPCC					84		168
84	9.1	Genetic testing					153		168
	1;5	Specific cancer risks					176		420
	6;11	Specific Surveillance					224		504
	12		46	45
	13		18	18
	14		44	43
	15		55	54
	16		40	39
	17		28	28
	18		54	53
	19		46	45
	20		39	38
	21		51	50
	22		52	51
